# Supplementary material for: LncRNA-Associated ceRNA Network Reveals Novel Potential Biomarkers of Laryngeal Squamous Cell Carcinoma
Source: PubMed Central journal article supplement — Technol Cancer Res Treat. 2020 Dec 28;19:1533033820985787. doi: 10.1177/1533033820985787 (PMC7780331; doi:10.1177/1533033820985787), 2020-12-28
Supplement: Supplementary_tables_(1).pdf [file Supplementary_tables_%281%29.pdf]

**Table S1 The list of top 50 differentially expressed mRNAs.**

| <b>Symbol</b> | <b>FDR</b> | <b>Regulation</b> | <b>Symbol</b> | <b>FDR</b> | <b>Regulation</b> |
|---------------|------------|-------------------|---------------|------------|-------------------|
| NETO2         | 0          | Up-regulation     | SORT1         | 0          | Down-regulation   |
| TTYH3         | 0          | Up-regulation     | RBM47         | 0          | Down-regulation   |
| RFC4          | 0          | Up-regulation     | PGM5          | 0          | Down-regulation   |
| PLAU          | 0          | Up-regulation     | GPX3          | 0          | Down-regulation   |
| NEK2          | 0          | Up-regulation     | PDCD4         | 0          | Down-regulation   |
| WDR53         | 0          | Up-regulation     | GCHFR         | 0          | Down-regulation   |
| WDR66         | 0          | Up-regulation     | PLEKHA6       | 0          | Down-regulation   |
| COL10A1       | 0          | Up-regulation     | CFD           | 0          | Down-regulation   |
| RSAD2         | 1.41E-13   | Up-regulation     | TM7SF2        | 1.41E-13   | Down-regulation   |
| PTHLH         | 1.41E-13   | Up-regulation     | ACADVL        | 1.41E-13   | Down-regulation   |
| RAD51AP1      | 2.69E-13   | Up-regulation     | SSBP2         | 1.24E-12   | Down-regulation   |
| RAB32         | 3.84E-13   | Up-regulation     | ZFAND2B       | 1.36E-12   | Down-regulation   |
| FZD6          | 4.90E-13   | Up-regulation     | SYNGR1        | 1.56E-12   | Down-regulation   |
| MTHFD2        | 1.06E-12   | Up-regulation     | VSIG2         | 2.98E-12   | Down-regulation   |
| PARP14        | 1.36E-12   | Up-regulation     | OGN           | 4.60E-12   | Down-regulation   |
| STIL          | 1.56E-12   | Up-regulation     | FAM189A2      | 4.84E-12   | Down-regulation   |
| HOMER3        | 2.26E-12   | Up-regulation     | ETFDH         | 5.15E-12   | Down-regulation   |
| ADAR          | 2.46E-12   | Up-regulation     | EDN3          | 6.11E-12   | Down-regulation   |
| PLXNA1        | 2.65E-12   | Up-regulation     | TCEA3         | 9.23E-12   | Down-regulation   |
| MB21D2        | 2.65E-12   | Up-regulation     | TJP3          | 1.27E-11   | Down-regulation   |
| MCM5          | 2.74E-12   | Up-regulation     | MKNK2         | 2.18E-11   | Down-regulation   |
| LAMP3         | 3.76E-12   | Up-regulation     | CEACAM7       | 2.54E-11   | Down-regulation   |
| GMPS          | 4.19E-12   | Up-regulation     | ISOC1         | 6.46E-11   | Down-regulation   |

---

|        |          |               |          |          |                 |
|--------|----------|---------------|----------|----------|-----------------|
| DCBLD1 | 5.29E-12 | Up-regulation | ABI3BP   | 8.49E-11 | Down-regulation |
| STC2   | 8.52E-12 | Up-regulation | SERPINB6 | 9.21E-11 | Down-regulation |

---

FDR false discovery rate

**Table S2 The top 15 significantly enriched GO-BP/CC terms and all significantly enriched GO-MF terms and KEGG pathways by target DEmRNAs of DEmiRNAs.**

| <b>Terms/Pathways</b> | <b>GO-ID</b> | <b>Description</b>                           | <b>No.</b> | <b>FDR</b> |
|-----------------------|--------------|----------------------------------------------|------------|------------|
| <i>GO-BP terms</i>    | GO:0006260   | DNA replication                              | 54         | 2.71E-07   |
|                       | GO:0051052   | regulation of DNA metabolic process          | 68         | 4.49E-06   |
|                       | GO:0030198   | extracellular matrix organization            | 57         | 7.08E-05   |
|                       | GO:0097191   | extrinsic apoptotic signaling pathway        | 42         | 7.08E-05   |
|                       | GO:0018209   | peptidyl-serine modification                 | 51         | 7.08E-05   |
|                       | GO:0006261   | DNA-dependent DNA replication                | 32         | 7.08E-05   |
|                       | GO:0043062   | extracellular structure organization         | 62         | 8.86E-05   |
|                       | GO:0018105   | peptidyl-serine phosphorylation              | 48         | 1.10E-04   |
|                       | GO:0090068   | positive regulation of cell cycle process    | 48         | 1.51E-04   |
|                       | GO:0051054   | positive regulation of DNA metabolic process | 40         | 1.60E-04   |

---

|                    |            |                                           |    |          |
|--------------------|------------|-------------------------------------------|----|----------|
|                    | GO:0002009 | morphogenesis of an epithelium            | 69 | 1.60E-04 |
|                    | GO:0000086 | G2/M transition of mitotic cell cycle     | 37 | 2.10E-04 |
|                    | GO:0048285 | organelle fission                         | 66 | 2.41E-04 |
|                    | GO:0044839 | cell cycle G2/M phase transition          | 39 | 2.48E-04 |
|                    | GO:2001233 | regulation of apoptotic signaling pathway | 57 | 8.50E-04 |
| <i>GO-CC terms</i> | GO:0098589 | membrane region                           | 52 | 4.82E-05 |
|                    | GO:0098857 | membrane microdomain                      | 49 | 1.20E-04 |
|                    | GO:0098687 | chromosomal region                        | 53 | 1.27E-04 |
|                    | GO:0045121 | membrane raft                             | 48 | 1.32E-04 |
|                    | GO:0000151 | ubiquitin ligase complex                  | 44 | 2.09E-04 |
|                    | GO:0016323 | basolateral plasma membrane               | 36 | 4.25E-04 |
|                    | GO:0000775 | chromosome, centromeric region            | 33 | 7.91E-04 |
|                    | GO:0030667 | secretory granule membrane                | 44 | 8.16E-04 |

---

---

|                    |            |                                                                         |    |          |
|--------------------|------------|-------------------------------------------------------------------------|----|----------|
|                    | GO:0061695 | transferase complex, transferring phosphorus-containing groups          | 40 | 8.16E-04 |
|                    | GO:0005657 | replication fork                                                        | 16 | 2.28E-03 |
|                    | GO:0043596 | nuclear replication fork                                                | 12 | 2.55E-03 |
|                    | GO:0070820 | tertiary granule                                                        | 27 | 5.27E-03 |
|                    | GO:0000793 | condensed chromosome                                                    | 33 | 6.26E-03 |
|                    | GO:0032154 | cleavage furrow                                                         | 13 | 6.80E-03 |
|                    | GO:0032155 | cell division site part                                                 | 14 | 8.90E-03 |
| <i>GO-MF terms</i> | GO:0030020 | extracellular matrix structural constituent conferring tensile strength | 13 | 3.70E-03 |
|                    | GO:0003725 | double-stranded RNA binding                                             | 18 | 1.21E-02 |
|                    | GO:0008094 | DNA-dependent ATPase activity                                           | 19 | 1.53E-02 |
|                    | GO:0046332 | SMAD binding                                                            | 18 | 1.53E-02 |
|                    | GO:0019838 | growth factor binding                                                   | 25 | 2.12E-02 |

---

---

|                      |            |                                          |    |          |
|----------------------|------------|------------------------------------------|----|----------|
|                      | GO:0004674 | protein serine/threonine kinase activity | 60 | 2.22E-02 |
|                      | GO:0004386 | helicase activity                        | 26 | 2.61E-02 |
|                      | GO:0042623 | ATPase activity, coupled                 | 49 | 2.61E-02 |
| <i>KEGG pathways</i> | hsa05160   | Hepatitis C                              | 30 | 1.06E-02 |
|                      | hsa04974   | Protein digestion and absorption         | 20 | 3.09E-02 |
|                      | hsa04668   | TNF signaling pathway                    | 22 | 3.09E-02 |
|                      | hsa05164   | Influenza A                              | 29 | 3.23E-02 |
|                      | hsa05132   | Salmonella infection                     | 33 | 3.23E-02 |
|                      | hsa04512   | ECM-receptor interaction                 | 18 | 3.23E-02 |
|                      | hsa03030   | DNA replication                          | 10 | 3.90E-02 |
|                      | hsa04151   | PI3K-Akt signaling pathway               | 49 | 4.39E-02 |
|                      | hsa04066   | HIF-1 signaling pathway                  | 20 | 4.68E-02 |

---

GO-BP: Gene Ontology-Biological Process; GO-MF: Gene Ontology-Molecular Function; GO-CC: Gene Ontology-Cellular Component; KEGG: Kyoto Encyclopedia of Genes and Genomes; FDR: false discovery rate; DEmRNAs: differentially expressed mRNAs; DEmiRNAs: differentially

expressed miRNAs.

**Table S3 The top 15 significantly enriched GO-BP/CC terms by target mRNAs of DElncRNAs.**

| <b>Terms/Pathways</b> | <b>GO-ID</b> | <b>Description</b>                                             | <b>No.</b> | <b>FDR</b> |
|-----------------------|--------------|----------------------------------------------------------------|------------|------------|
| <i>GO-BP terms</i>    | GO:0006342   | chromatin silencing                                            | 5          | 2.61E-02   |
|                       | GO:0072599   | establishment of protein localization to endoplasmic reticulum | 5          | 2.61E-02   |
|                       | GO:0045814   | negative regulation of gene expression, epigenetic             | 5          | 2.61E-02   |
|                       | GO:0090150   | establishment of protein localization to membrane              | 7          | 2.61E-02   |
|                       | GO:0046677   | response to antibiotic                                         | 7          | 2.61E-02   |
|                       | GO:0042542   | response to hydrogen peroxide                                  | 5          | 2.61E-02   |
|                       | GO:0071236   | cellular response to antibiotic                                | 5          | 2.61E-02   |
|                       | GO:0070972   | protein localization to endoplasmic reticulum                  | 5          | 2.61E-02   |
|                       | GO:0097237   | cellular response to toxic substance                           | 6          | 2.61E-02   |
|                       | GO:0007411   | axon guidance                                                  | 6          | 3.51E-02   |



---

|             |            |                                                             |   |          |
|-------------|------------|-------------------------------------------------------------|---|----------|
|             | GO:0097485 | neuron projection guidance                                  | 6 | 3.51E-02 |
|             | GO:0061564 | axon development                                            | 8 | 3.51E-02 |
|             | GO:0070301 | cellular response to hydrogen peroxide                      | 4 | 3.55E-02 |
|             | GO:0071103 | DNA conformation change                                     | 6 | 4.25E-02 |
|             | GO:0006614 | SRP-dependent cotranslational protein targeting to membrane | 4 | 4.25E-02 |
| GO-CC terms | GO:0022625 | cytosolic large ribosomal subunit                           | 4 | 1.73E-02 |
|             | GO:0043209 | myelin sheath                                               | 5 | 2.92E-02 |
|             | GO:0005903 | brush border                                                | 4 | 2.92E-02 |
|             | GO:0044391 | ribosomal subunit                                           | 5 | 2.92E-02 |
|             | GO:0031965 | nuclear membrane                                            | 6 | 2.92E-02 |
|             | GO:0022626 | cytosolic ribosome                                          | 4 | 2.92E-02 |
|             | GO:0015934 | large ribosomal subunit                                     | 4 | 3.02E-02 |
|             | GO:0005635 | nuclear envelope                                            | 7 | 3.39E-02 |

---

---

|            |                                         |   |          |
|------------|-----------------------------------------|---|----------|
| GO:0031143 | pseudopodium                            | 2 | 3.92E-02 |
| GO:0098862 | cluster of actin-based cell projections | 4 | 3.92E-02 |
| GO:0044445 | cytosolic part                          | 5 | 3.92E-02 |
| GO:0005766 | primary lysosome                        | 4 | 3.92E-02 |
| GO:0042582 | azurophil granule                       | 4 | 3.92E-02 |
| GO:0000792 | heterochromatin                         | 3 | 3.92E-02 |
| GO:0005925 | focal adhesion                          | 6 | 3.92E-02 |

---

GO-BP: Gene Ontology-Biological Process; GO-CC: Gene Ontology-Cellular Component; FDR: false discovery rate; DElncRNAs: differentially expressed lncRNAs.

**Table S4 The subcellular localization of 17 DElncRNA in ceRNA network.**

| <b>lncRNA</b> | <b>Cytoplasm</b> | <b>Nucleus</b> | <b>Ribosome</b> | <b>Cytosol</b> | <b>Exosome</b> | <b>Prediction</b> |
|---------------|------------------|----------------|-----------------|----------------|----------------|-------------------|
| AL121839.2    | 0.898567425      | 0.027368317    | 0.016199798     | 0.05616501     | 0.00169945     | Cytoplasm         |
| ZNF503-AS1    | 0.065571121      | 0.007297334    | 0.065213781     | 0.860225527    | 0.001692237    | Cytosol           |
| LINC02147     | 0.882511665      | 0.022524054    | 0.018746987     | 0.07491883     | 0.001298464    | Cytoplasm         |
| AL354956.1    | 0.050204498      | 0.009913713    | 0.45061779      | 0.481260048    | 0.008003952    | Cytosol           |
| AC079328.2    | 0.891630473      | 0.029240892    | 0.01546238      | 0.061445438    | 0.002220817    | Cytoplasm         |
| DGCR9         | 0.020287168      | 0.003389453    | 0.422625984     | 0.548115946    | 0.005581449    | Cytosol           |
| AC006064.2    | 0.058025191      | 0.01718853     | 0.022731075     | 0.898034757    | 0.004020447    | Cytosol           |
| AC078778.1    | 0.031874003      | 0.002329916    | 0.576596174     | 0.383435925    | 0.005763982    | Ribosome          |
| AC004943.2    | 0.870423462      | 0.02514308     | 0.020469637     | 0.08228416     | 0.001679661    | Cytoplasm         |
| AC007620.2    | 0.33969809       | 0.023268489    | 0.106271377     | 0.526745101    | 0.004016943    | Cytosol           |
| MELTF-AS1     | 0.053285586      | 0.010370459    | 0.030361157     | 0.849757583    | 0.056225216    | Cytosol           |

---

|            |             |             |             |             |             |           |
|------------|-------------|-------------|-------------|-------------|-------------|-----------|
| AC084024.3 | 0.034785426 | 0.001951721 | 0.575239461 | 0.376074836 | 0.011948556 | Ribosome  |
| AC024267.6 | 0.034795943 | 0.005628238 | 0.032254044 | 0.849819168 | 0.077502607 | Cytosol   |
| AP001439.1 | 0.132908462 | 0.048022511 | 0.076161224 | 0.719412465 | 0.023495339 | Cytosol   |
| AC106820.5 | 0.050361069 | 0.020344449 | 0.025777076 | 0.868887382 | 0.034630024 | Cytosol   |
| HMGA2-AS1  | 0.871585334 | 0.018370052 | 0.017041894 | 0.091145443 | 0.001857277 | Cytoplasm |
| DGCR5      | 0.020015199 | 0.003428247 | 0.094134182 | 0.87042668  | 0.011995692 | Cytosol   |

---

DElncRNAs: differentially expressed lncRNAs; ceRNA: competing endogenous RNA.
